# Supplementary material for: Salt-protected carbonization of a metal–organic framework for enhanced nitrogen doping and high porosity leading to efficient performance in oxygen reduction reactions
Source: Royal Society of Chemistry journal article supplement (doi:10.1039/d5qi02283e), 2025-12-30
Supplement: d5qi02283e1.pdf [file d5qi02283e1.pdf]

## Electronic Supplementary Information

### **Salt-protected carbonization of a metal–organic framework for enhanced nitrogen doping and high porosity leading to efficient performance in oxygen reduction reaction**

*Ahram Yoo, Sujeong Lee, Sojin Oh, Songhee Kim and Moonhyun Oh\**

Department of Chemistry, Yonsei University, 50 Yonsei-ro, Seodaemun-gu, Seoul 03722, South Korea

\*Corresponding author.

*E-mail:* moh@yonsei.ac.kr

### *Materials and Characterizations*

Zinc(II) nitrate hexahydrate ( $\text{Zn}(\text{NO}_3)_2 \cdot 6\text{H}_2\text{O}$ , 98%), 1,4-benzenedicarboxylic acid ( $\text{H}_2\text{BDC}$ , 98%), *N,N*-dimethylacetamide (DMA, 99%), urea (99.0–100.5%), sodium chloride ( $\text{NaCl}$ ,  $\geq 99.5\%$ ), 20 wt% platinum on graphitized carbon (Pt/C), and 5 wt% Nafion solution were purchased from Sigma-Aldrich. Methylene chloride (98%) and ethyl alcohol (99.5%) were purchased from SAMCHUN. Deionized water was obtained from Millipore Direct-Q3. All pellet samples were prepared using an MTI Corporation YLJ-24TS hydraulic press. Scanning electron microscopy (SEM) images were acquired using a JEOL IT-500HR field-emission SEM instrument (Yonsei Center for Research Facilities, Yonsei University). Elemental mapping images were acquired using a JEOL JSM-IT500HR field-emission SEM equipped with a JEOL EX-74600U4L2Q energy-dispersive X-ray spectroscopy (EDX) detector. Powder X-ray diffraction (PXRD) patterns were obtained using a Rigaku MiniFlex 600 instrument equipped with a  $\text{Cu K}\alpha$  radiation source (40 kV, 15 mA). Energy-dispersive X-ray (EDX) spectra were obtained using a Hitachi SU 1510 SEM equipped with a Horiba EMAX Energy E-250 EDX system. The  $\text{N}_2$  adsorption–desorption isotherms (77 K) were measured using a BELSORP Max volumetric adsorption equipment system. All isotherms were obtained after pretreatment under a dynamic vacuum at 25 °C for 3 h, except in the case of MOF-5. MOF-5 was analyzed after pretreatment under a dynamic vacuum at 300 °C for 3 h. Raman spectra were acquired using a Raman spectrometer (HORIBA Jobin Yvon LabRAM ARAMIS) at room temperature with a 0.5 mW YAG laser (532 nm). X-ray photoelectron spectroscopy (XPS) analysis was conducted using a Thermo Scientific K-Alpha KA1066 spectrometer with a monochromatic  $\text{Al K}\alpha$  X-ray source ( $h\nu = 1486.6$  eV). The XPS profiles were calibrated using the measured C 1s peak position at 284.6 eV.

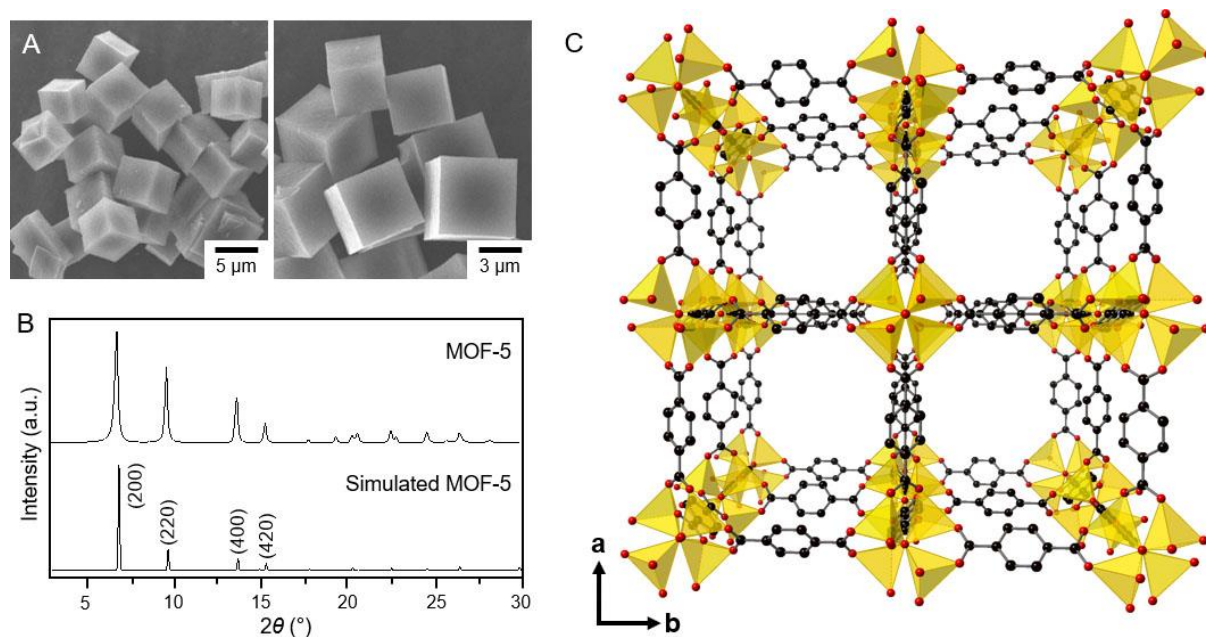

**Fig. S1** (A) SEM images of MOF-5. (B) PXRD pattern of MOF-5 with the simulated PXRD pattern included for reference. Ball-and-stick representation of MOF-5, depicting carbon (black), oxygen (red), and zinc (dark yellow) atoms. Hydrogen atoms are omitted for clarity. [Cambridge Crystallographic Data Centre (CCDC) 938392].<sup>1</sup>

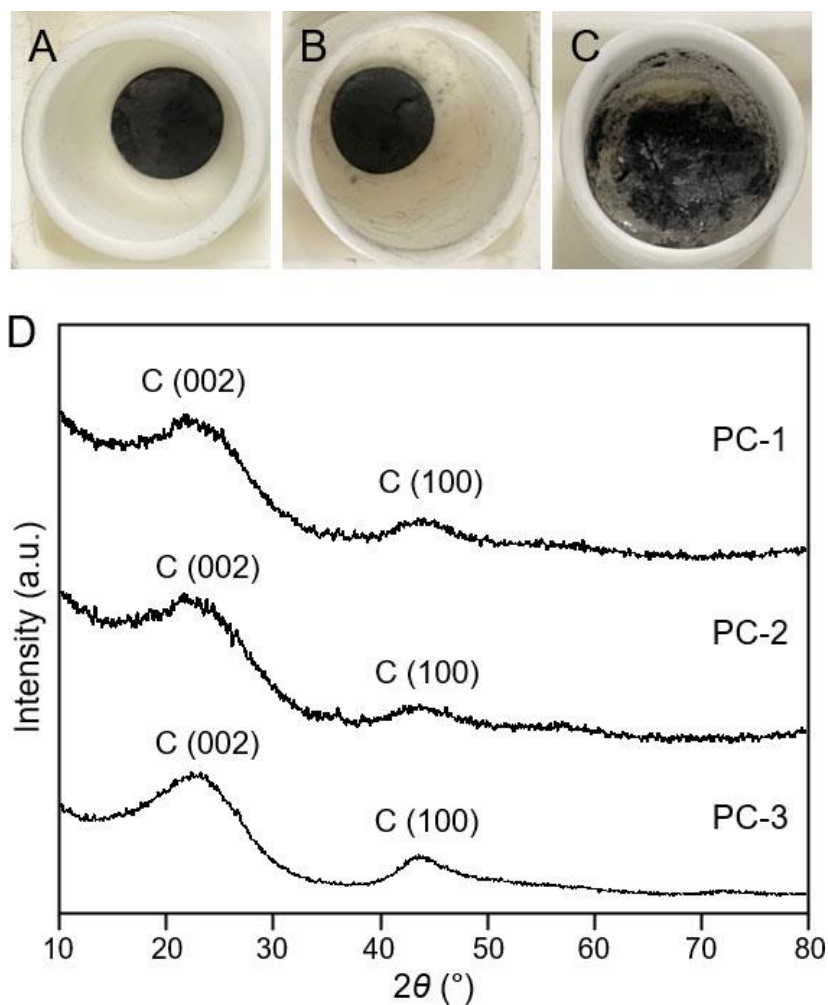

**Fig. S2** Photographs of pellets of (A) MOF-5, (B) MOF-5/urea, and (C) MOF-5/urea@NaCl after pyrolysis at 950 °C for 3 h. (D) PXRD patterns of PC-1–PC-3.

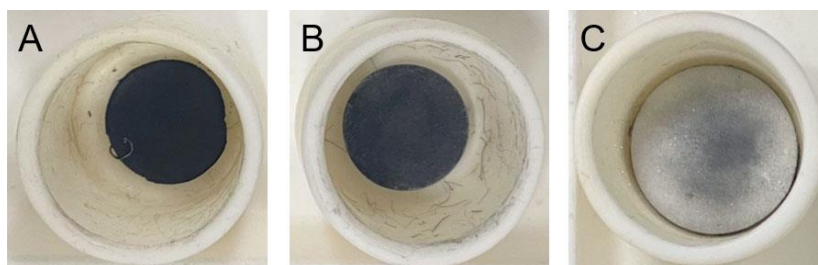

**Fig. S3** Photographs of pellets of (A) MOF-5, (B) MOF-5/urea, and (C) MOF-5/urea@NaCl after pyrolysis at 800 °C for 3 h.

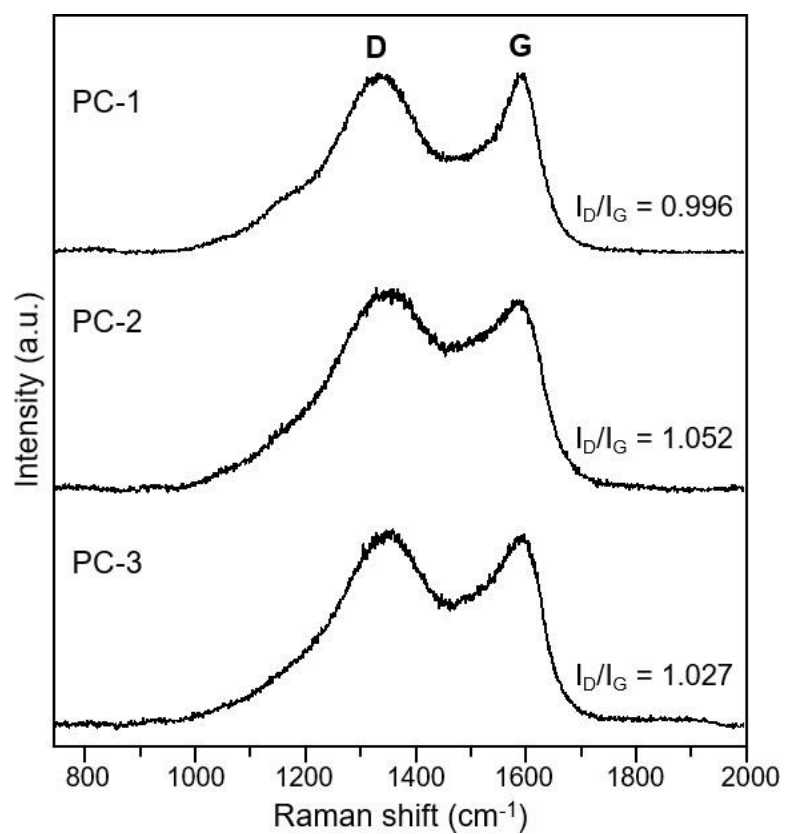

**Fig. S4** Raman spectra of PC-1–PC-3.

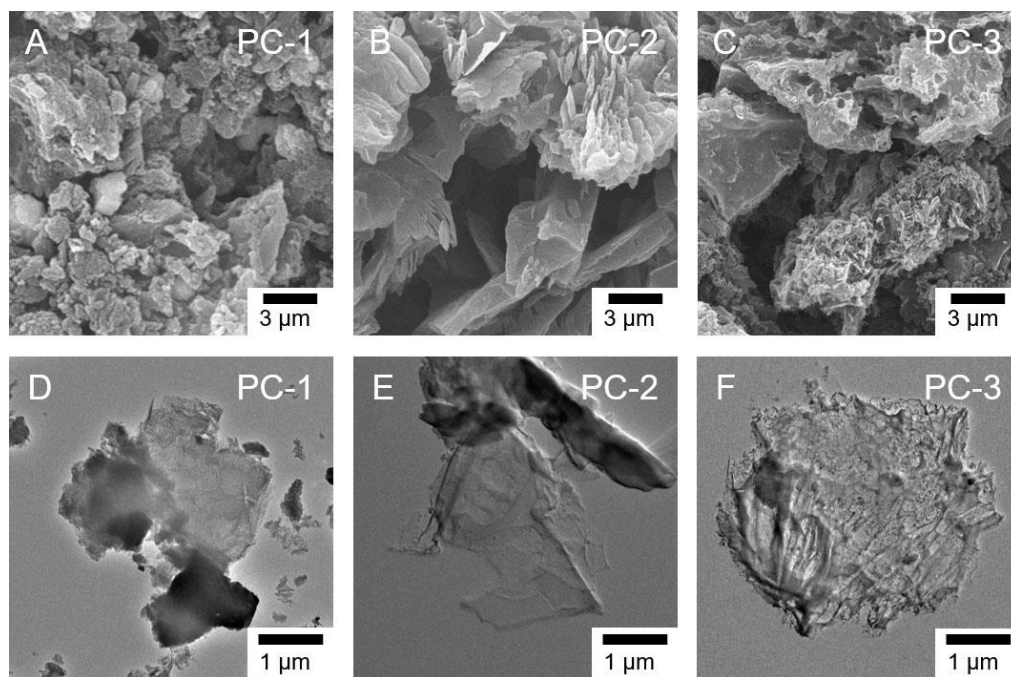

**Fig. S5** (A–C) SEM and (D–F) TEM images of PC-1–PC-3.

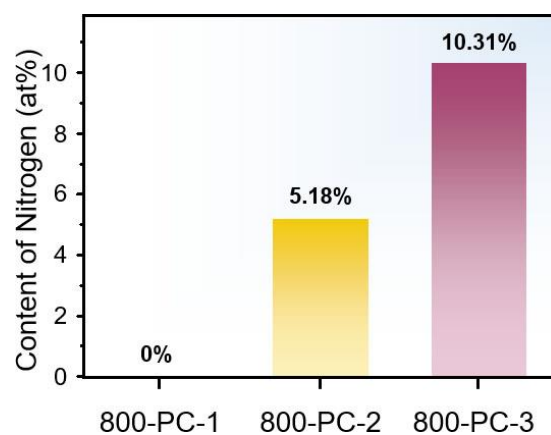

**Fig. S6** Nitrogen content analysis of products (800-PC-1, 800-PC-2, and 800-PC-3) obtained after pyrolysis of MOF-5, MOF-5/urea, and MOF-5/urea@NaCl at 800 °C for 3 h.

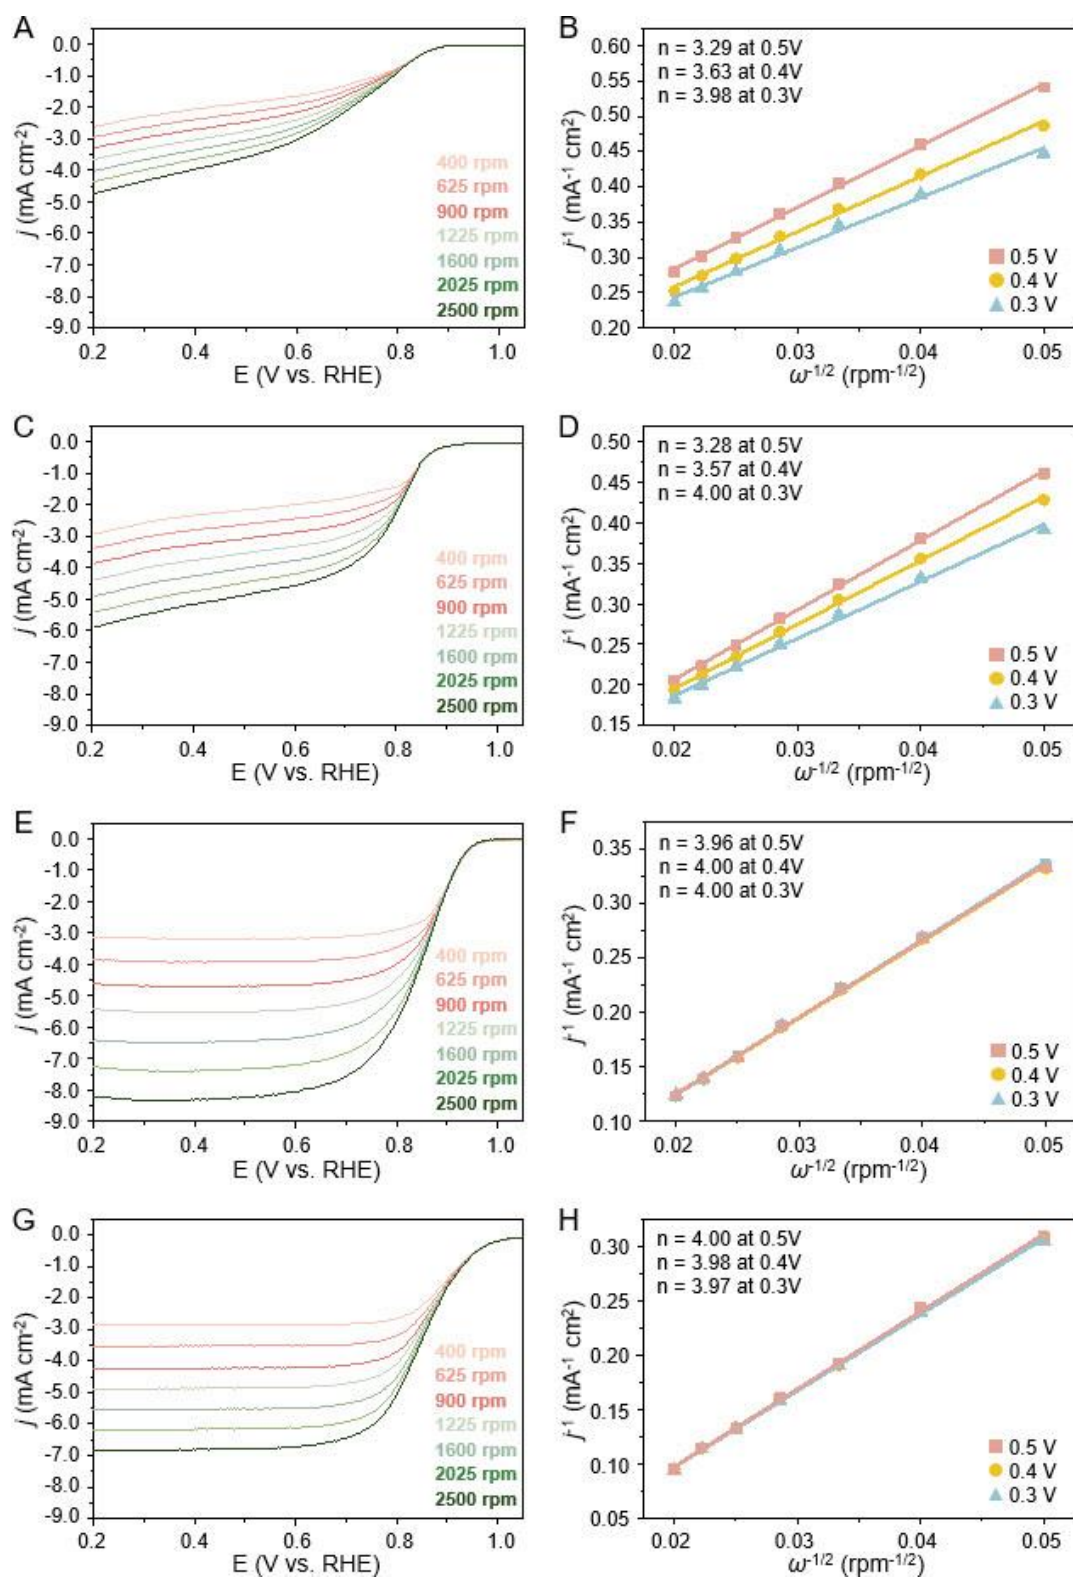

**Fig. S7** (A, C, E, G) LSV curves of PC-1-PC-3 and Pt/C, respectively, recorded at different electrode rotation rates (400–2500 rpm). (B, D, F, H) K–L plots of PC-1-PC-3 and Pt/C, respectively, at various potentials (0.3–0.5 V).



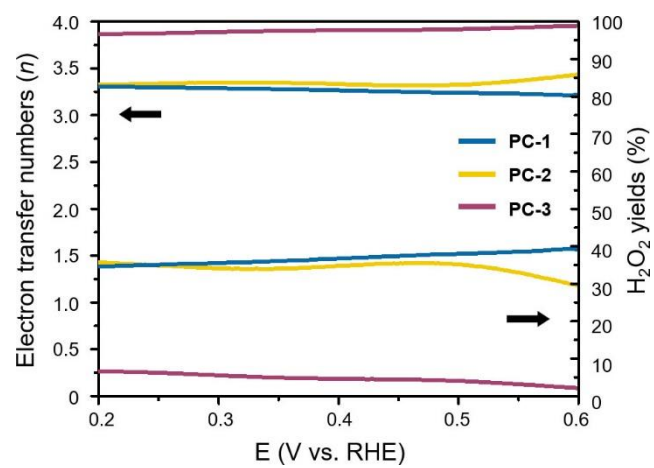

**Fig. S8** Electron transfer numbers ( $n$ ) and  $\text{H}_2\text{O}_2$  yields of PC-1–PC-3.

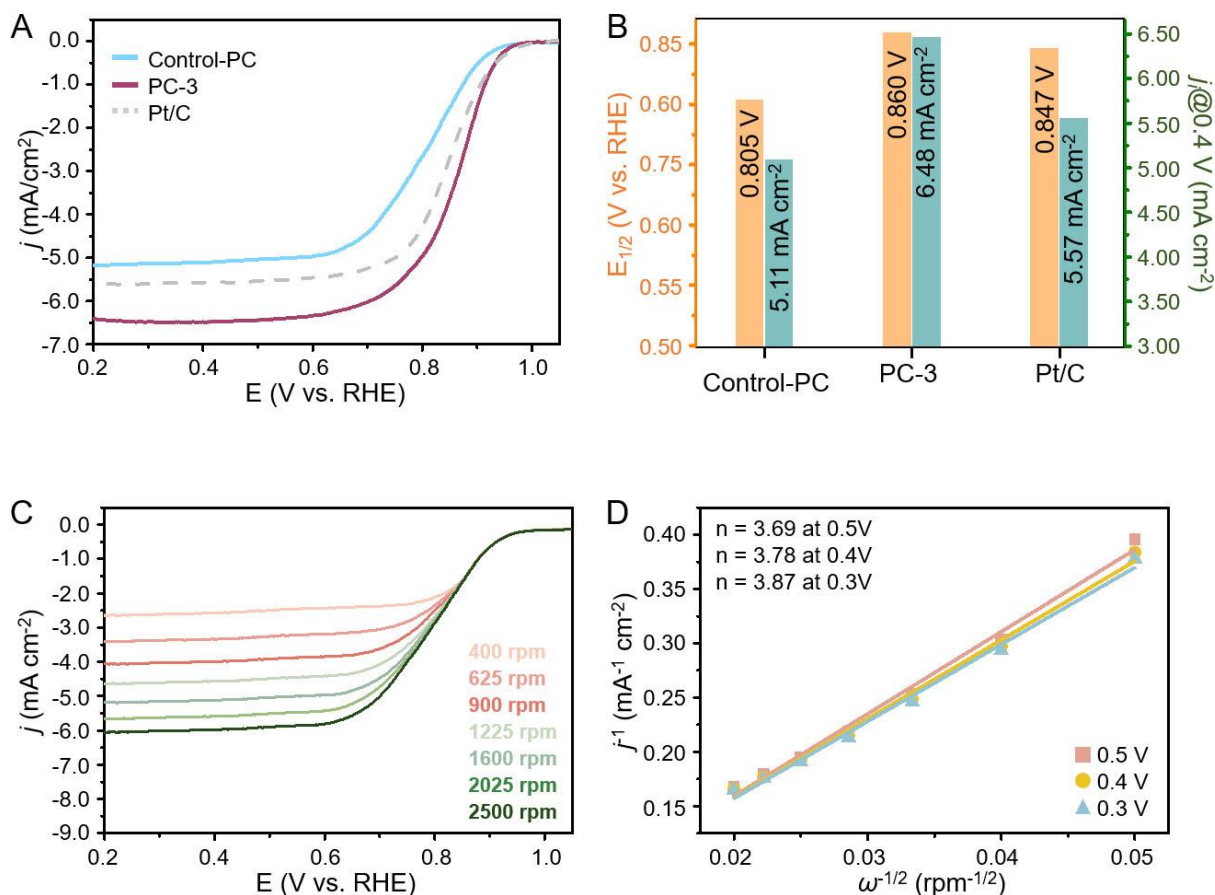

**Fig. S9** (A) LSV curves of PC-3, Pt/C, and the sample derived from the MOF/urea/NaCl mixture (using NaCl as a simple additive rather than as a salt-protected shell) in O<sub>2</sub>-saturated 0.1 M KOH electrolyte at a rotation rate of 1600 rpm. (B) Comparison of half-wave potentials and limiting current densities ( $j_l$ ) at 0.4 V for catalysts. (C) LSV curves recorded at different electrode rotation rates (400–2500 rpm) and (D) K–L plots at various potentials (0.3–0.5 V) of the sample derived from the MOF/urea/NaCl mixture. The porous carbon sample derived from the MOF/urea/NaCl mixture is denoted as Control-PC.

**Table S1** BET surface areas and total pore volumes of pure MOF-5 and PC-1–PC-3.

| Sample | Surface area<br>(m <sup>2</sup> g <sup>-1</sup> ) | Total pore volume<br>(cm <sup>3</sup> g <sup>-1</sup> ) |
|--------|---------------------------------------------------|---------------------------------------------------------|
| MOF-5  | 1242                                              | 0.54                                                    |
| PC-1   | 968                                               | 0.83                                                    |
| PC-2   | 311                                               | 0.28                                                    |
| PC-3   | 1393                                              | 1.38                                                    |

**Table S2** Comparison of ORR activity of PC-3 with that of other electrocatalysts in the recently developed alkaline electrolyte.

| Sample                                                   | Loading<br>(mg <sup>2</sup> cm <sup>-2</sup> ) | $E_{1/2}$<br>(V vs. RHE) | $j_l$<br>(mA cm <sup>-2</sup> ) | Reference |
|----------------------------------------------------------|------------------------------------------------|--------------------------|---------------------------------|-----------|
| PC-3                                                     | 0.20                                           | 0.860                    | 6.48                            | This work |
| NBCNT-10                                                 | 0.51                                           | 0.820                    | 5.52                            | 2         |
| FePc@CNF                                                 | 0.80                                           | 0.875                    | 5.62                            | 3         |
| H-NSC@Co/NSC                                             | 0.03                                           | 0.850                    | 5.60                            | 4         |
| Co/SP-NC                                                 | 0.42                                           | 0.860                    | 5.26                            | 5         |
| COF@ZIF-Pd <sub>800</sub>                                | 1.20                                           | 0.866                    | 4.98                            | 6         |
| A-MnO <sub>2</sub> /NSPC-2                               | 0.29                                           | 0.870                    | 5.40                            | 7         |
| MnCo <sub>2</sub> O <sub>4</sub> /NCNTs                  | 0.20                                           | 0.760                    | 6.06                            | 8         |
| C-1000                                                   | 0.26                                           | 0.833                    | 5.60                            | 9         |
| Porous CS                                                | 0.46                                           | 0.740                    | 5.92                            | 10        |
| Cu-SACs-7                                                | 0.26                                           | 0.897                    | 6.50                            | 11        |
| Co@Co <sub>3</sub> O <sub>4</sub> /NC-2                  | 0.25                                           | 0.810                    | 4.20                            | 12        |
| IO-Ni <sub>x</sub> Co <sub>9-x</sub> S <sub>8</sub> @NSC | 0.30                                           | 0.926                    | 5.70                            | 13        |
| FeCo@CNTs-60                                             | 1.40                                           | 0.95                     | 6.85                            | 14        |

## References

- 1 A. J. Graham, D. R. Allan, A. Muszkiewicz, Carole A. Morrison and S. A. Moggach, The effect of high pressure on MOF-5: guest-induced modification of pore size and content at high pressure, *Angew. Chem. Int. Ed.*, 2011, **50**, 11138–11141.
- 2 P. Wei, X. Li, Z. He, X. Sun, Q. Liang, Z. Wang, C. Fang, Q. Li, H. Yang, J. Han and Y. Huang, Porous N, B co-doped carbon nanotubes as efficient metal-free electrocatalysts for ORR and Zn-air batteries, *Chem. Eng. J.*, 2021, **422**, 130134.
- 3 Y. Wu, J. Liu, Q. Sun, J. Chen, X. Zhu, R. Abazaria and J. Qian, Molecular catalyst of Fe phthalocyanine loaded into In-based MOF-derived defective carbon nanoflowers for oxygen reduction, *Chem. Eng. J.*, 2024, **483**, 149243.
- 4 W. Li, J. Wang, J. Chen, K. Chen, Z. Wen and A. Huang, Core–shell carbon-based bifunctional electrocatalysts derived from COF@MOF hybrid for advanced rechargeable Zn–air batteries, *Small*, 2022, **18**, 2202018.
- 5 H. Chang, X. Liu, S. Zhao, Z. Liu, R. Lv, Q. Zhang and T.-F. Yi, Self-assembled 3D N/P/S-tridoped carbon nanoflower with highly branched carbon nanotubes as efficient bifunctional oxygen electrocatalyst toward high-performance rechargeable Zn-air batteries, *Adv. Funct. Mater.*, 2024, **34**, 2313491.
- 6 S. Fei, Z. He, S. Yang, J. Li, X. Li, H. Zhao, Q. Xu, X. Liu and Z. Jiang, In situ construction of highly dispersed Pd on cobalt nanoparticle on hollow functional cubic graphene by double framework for ORR, *Small*, 2024, **20**, 2403655.
- 7 L. Huo, M. Lv, M. Li, X. Ni, J. Guan, J. Liu, S. Mei, Y. Yang, M. Zhu, Q. Feng, P. Geng, J. Hou, N. Huang, W. Liu, X. Y. Kong, Y. Zheng and L. Ye, Amorphous MnO<sub>2</sub> lamellae encapsulated covalent triazine polymer-derived multi-heteroatoms-doped carbon for ORR/OER bifunctional electrocatalysis, *Adv. Mater.*, 2024, **36**, 2312868.

- 8 Z. Wang, J. Huang, L. Wang, Y. Liu, W. Liu, S. Zhao and Z.-Q. Liu, Cation-tuning induced d-band center modulation on Co-based spinel oxide for oxygen reduction/evolution reaction, *Angew. Chem. Int. Ed.*, 2022, **61**, e202114696.
- 9 F. Qin, P. Zuo, N. Li, S. Qu and W. Shen, 3D flower-like carbon spheres with hierarchical pore structure: an efficient asphaltene-based metal-free catalyst for ORR, *Adv. Mater. Interfaces*, 2022, **9**, 2201157.
- 10 C. Su, Y. Liu, Z. Luo, J.-P. Veder, Y. Zhong, S. P. Jiang and Z. Shao, Defects-rich porous carbon microspheres as green electrocatalysts for efficient and stable oxygen-reduction reaction over a wide range of pH values, *Chem. Eng. J.*, 2021, **406**, 126883.
- 11 X. Yao, Y. Zhu, T. Xia, Z. Han, C. Du, L. Yang, J. Tian, X. Ma, J. Hou and C. Cao, Tuning carbon defect in copper single-atom catalysts for efficient oxygen reduction, *Small*, 2023, **19**, 2301075.
- 12 C. Qi, L. Zhang, G. Xu, Z. Sun, A. Zhao and D. Jia, Co@Co<sub>3</sub>O<sub>4</sub> nanoparticle embedded nitrogen-doped carbon architectures as efficient bicatalysts for oxygen reduction and evolution reactions, *Appl. Surf. Sci.*, 2018, **427**, 319–327.
- 13 Y. Son, K. Min, S. Cheong, B. Lee, S. E. Shim and S.-H. Baeck, Innovative air cathode with Ni-doped cobalt sulfide in highly ordered macroporous carbon matrix for rechargeable Zn–air battery, *Adv. Sci.*, 2024, **11**, 2407915.
- 14 C. Fang, X. Tang and Q. Yi, Adding Fe/dicyandiamide to Co-MOF to greatly improve its ORR/OER bifunctional electrocatalytic activity, *Appl. Catal. B Environ.*, 2024, **341**, 123346.
